# Supplementary material
Source: MDPI journal article supplement (https://www.mdpi.com/2073-4344/9/12/985)
Supplement: s1 [file s1]

## Supporting information

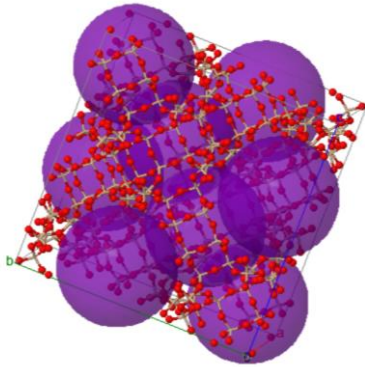

**FAU (purple ball = supercage)**

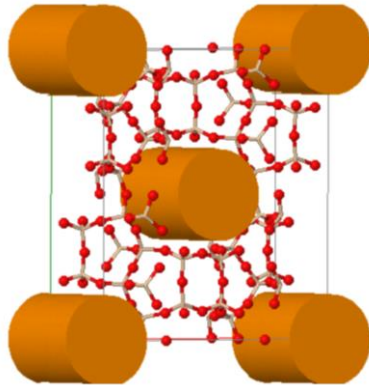

**MOR (cylinder: large channel)**

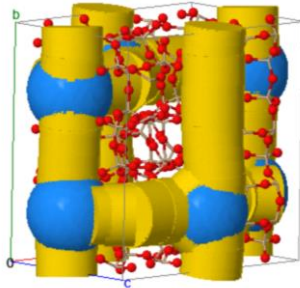

**MFI: blue ball: intersection channel (yellow cylinder)**

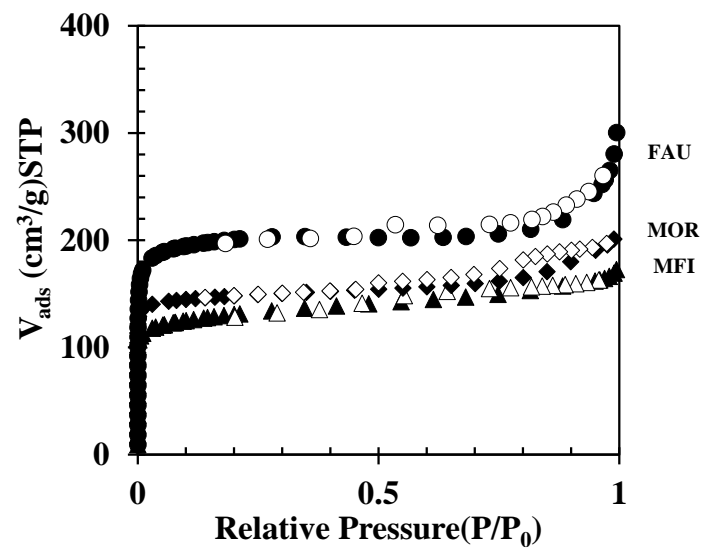

**Figure S1:** N<sub>2</sub> adsorption (solid symbols) and desorption (open symbols) isotherms at 77 K of FAU, MOR and MFI zeolites.
